# Supplementary material for: Preventing Surgical Complications During Microscopic Fenestration in Middle Fossa Arachnoid Cysts: A Retrospective Study for 38 Cases and Literature Review
Source: Research Square preprint supplement (doi:10.21203/rs.3.rs-815432/v1), 2021-08-25
Supplement: Supplementary file 1 [file 06c8e27fb049d0c41c5d61a8.docx]

Supplemental Table 1. Patient demographics and clinical characteristics

| **Variable** | **N (%)** |
| --- | --- |
| **M/F (No.)** | 31/7 |
| **Mean age±SD (y.o.)** | 5.8±3.2 |
| **Symptomatic** | 19 (50.0%) |
| Headache/dizziness | 9 (23.7%) |
| Bony bulging | 3 (7.9%) |
| Speech delay | 2 (5.3%) |
| Seizure | 2 (5.3%) |
| Others | 3 (7.9%) |
| **Laterality** |  |
| Left | 32 (84.2%) |
| Right | 6 (15.8%) |
| **Image characteristics** |  |
| The largest diameter (cm) | 7.8±2.8 |
| Cyst’s size (cm3) | 149.4±113.8 |
| Skull malformation | 15 (39.5%) |
| Midline shift | 13 (34.2%) |
| Galassi classification |  |
| II | 8 (21.1%) |
| III | 30 (78.9%) |
| **Surgery duration (minutes)** | 118.6±43* |
| **Complication** |  |
| SH | 8 (21.1%) |
| SH that require reoperation | 1 (2.6%) |
| PCNSI | 1 (2.6%) |
| **Hospitalization (days)** | 5.6±2.0 |
| **Following-up duration (months)** | 9.1±5.1 |

*The record of surgery duration was missed in one patient.
