# Supplementary material for: Preventing Surgical Complications During Microscopic Fenestration in Middle Fossa Arachnoid Cysts: A Retrospective Study for 38 Cases and Literature Review
Source: Research Square preprint supplement (doi:10.21203/rs.3.rs-815432/v1), 2021-08-25
Supplement: Supplementary file 2 [file 4ba31dff406b1ef918724e1b.docx]

Supplemental Table 3. Logistic regression of risk factors for subdural hygroma.

| **Step** | **Variable** | **OR (95% CI)** | **P** |
| --- | --- | --- | --- |
| **1** | **Age (y.o.)** | 0.743 (0.513-1.076) | 0.115 |
| **Cyst volume (cm3)** | 1.000 (1.000-1.000) | 0.177 |
| **2** | **Age (y.o.)** | 0.768 (0.555-1.062) | 0.110 |

Method: Backward: Wald. Hosmer and Lemeshow test P value, Step 1=0.533, Step 2=0.190.
