# Supplementary material for: Preventing Surgical Complications During Microscopic Fenestration in Middle Fossa Arachnoid Cysts: A Retrospective Study for 38 Cases and Literature Review
Source: Research Square preprint supplement (doi:10.21203/rs.3.rs-815432/v1), 2021-08-25
Supplement: Supplementary file 3 [file fe1c23a3747329aa35587064.docx]

Supplemental Table 5. Occurrence rates of commonly reported short-term postoperative complications in the literature.

|  | SDH | Cranial nerve palsy | Postoperative hemorrhage | CSF leak | PCNSI |
| --- | --- | --- | --- | --- | --- |
| All ages  649 cases | 32 cases (4.9%) required re-operation reported in 9 series. Rate ranges from 3.1% to 20.8%. | 23 cases (3.5%) reported in 8 series. Rate ranges from 3.0% to 12.0%. | 17 cases (2.6%) reported in 6 series. Rate ranges from 2.9% to 20.0%. | 12 cases (1.8%) reported in 5 series. Rate ranges from 2.5% to 12.0%.c | 8 cases (1.2%) reported in 6 series. Rate ranges from 2.5% to 9.1%. |
| Children  (0-18 y.o.) *  407 cases | 20 (4.9%) cases required re-operation reported in 5 series. Rate ranges from 3.6% to 20.8%. | 11 cases (2.7%) reported in 3 series. Rate ranges from 3.1% to 12.0%. | 16 cases (3.9%) reported in 5 series. Rate ranges from 2.9% to 20.0%. | 9 cases (2.2%) reported in 3 series. Rate ranges from 5.1% to 12.0%. | 3 cases (0.7%) reported in 2 series. Rate ranges from 2.6% to 4.0%. |
| Microscopic fenestration  (215 cases in 6 studies) | 4 cases (1.8%) required re-operation. | 6 cases (2.7%) | 3 cases (1.3%) | 6 cases (2.7%) | 2 cases (0.9%) |
| Endoscopic fenestration  (263 cases in 10 studies) | 6 cases (2.2%) required re-operation. | 10 cases (3.8%) | 8 cases (3.0%) | 2 cases (0.8%) | 3 cases (1.1%) |

Microscopic fenestration and endoscopic fenestration include the studies that purely using those technique. *Series which exclusively study on children.
